# Supplementary material
Source: MDPI journal article supplement (https://www.mdpi.com/2073-445X/11/5/638)
Supplement: s1 [file s1]

**Table S1.** Accuracy assessment of land cover classification from 2000 to 2020

| Land cover |   | 1   | 2  | 3  | 4   | 5  | 6  | 7   | UA(%)  | PA(%)  | OA(%) |
|------------|---|-----|----|----|-----|----|----|-----|--------|--------|-------|
| 2000       | 1 | 86  | 3  | 0  | 2   | 1  | 0  | 1   | 92.47  | 89.58  | 90.58 |
|            | 2 | 1   | 73 | 0  | 0   | 0  | 0  | 2   | 96.05  | 81.11  |       |
|            | 3 | 0   | 0  | 70 | 0   | 0  | 5  | 0   | 93.33  | 98.59  |       |
|            | 4 | 3   | 0  | 0  | 143 | 2  | 0  | 6   | 92.86  | 91.67  |       |
|            | 5 | 0   | 0  | 0  | 8   | 74 | 4  | 0   | 86.05  | 92.50  |       |
|            | 6 | 0   | 0  | 1  | 2   | 3  | 56 | 0   | 90.32  | 84.85  |       |
|            | 7 | 6   | 14 | 0  | 1   | 0  | 1  | 133 | 85.81  | 93.66  |       |
| 2010       | 1 | 112 | 0  | 0  | 0   | 0  | 0  | 0   | 100.00 | 92.56  | 94.66 |
|            | 2 | 3   | 76 | 0  | 0   | 0  | 1  | 2   | 92.68  | 93.83  |       |
|            | 3 | 0   | 0  | 78 | 0   | 0  | 6  | 0   | 92.86  | 100.00 |       |
|            | 4 | 0   | 0  | 0  | 153 | 0  | 0  | 4   | 97.45  | 97.45  |       |
|            | 5 | 0   | 0  | 0  | 2   | 74 | 2  | 1   | 93.67  | 98.67  |       |
|            | 6 | 0   | 1  | 0  | 0   | 1  | 70 | 4   | 92.11  | 88.61  |       |
|            | 7 | 6   | 4  | 0  | 2   | 0  | 0  | 129 | 91.49  | 92.14  |       |
| 2020       | 1 | 93  | 0  | 0  | 1   | 0  | 0  | 0   | 98.94  | 94.90  | 94.40 |
|            | 2 | 0   | 75 | 0  | 0   | 0  | 0  | 1   | 98.68  | 93.75  |       |
|            | 3 | 0   | 0  | 68 | 0   | 0  | 7  | 0   | 90.67  | 97.14  |       |
|            | 4 | 0   | 0  | 0  | 152 | 2  | 1  | 0   | 98.06  | 96.20  |       |
|            | 5 | 0   | 0  | 0  | 4   | 63 | 2  | 2   | 88.73  | 90.00  |       |
|            | 6 | 0   | 2  | 2  | 0   | 4  | 74 | 1   | 89.16  | 88.10  |       |
|            | 7 | 5   | 3  | 0  | 1   | 1  | 0  | 133 | 93.00  | 97.08  |       |

Note: 1: Water; 2: Urban land; 3: Glaciers/permanent snow; 4: Forestland; 5: Grassland; 6: Barren land; 7: Cropland.
